# Supplementary material
Source: PubMed Central journal article supplement (PMC10529787)

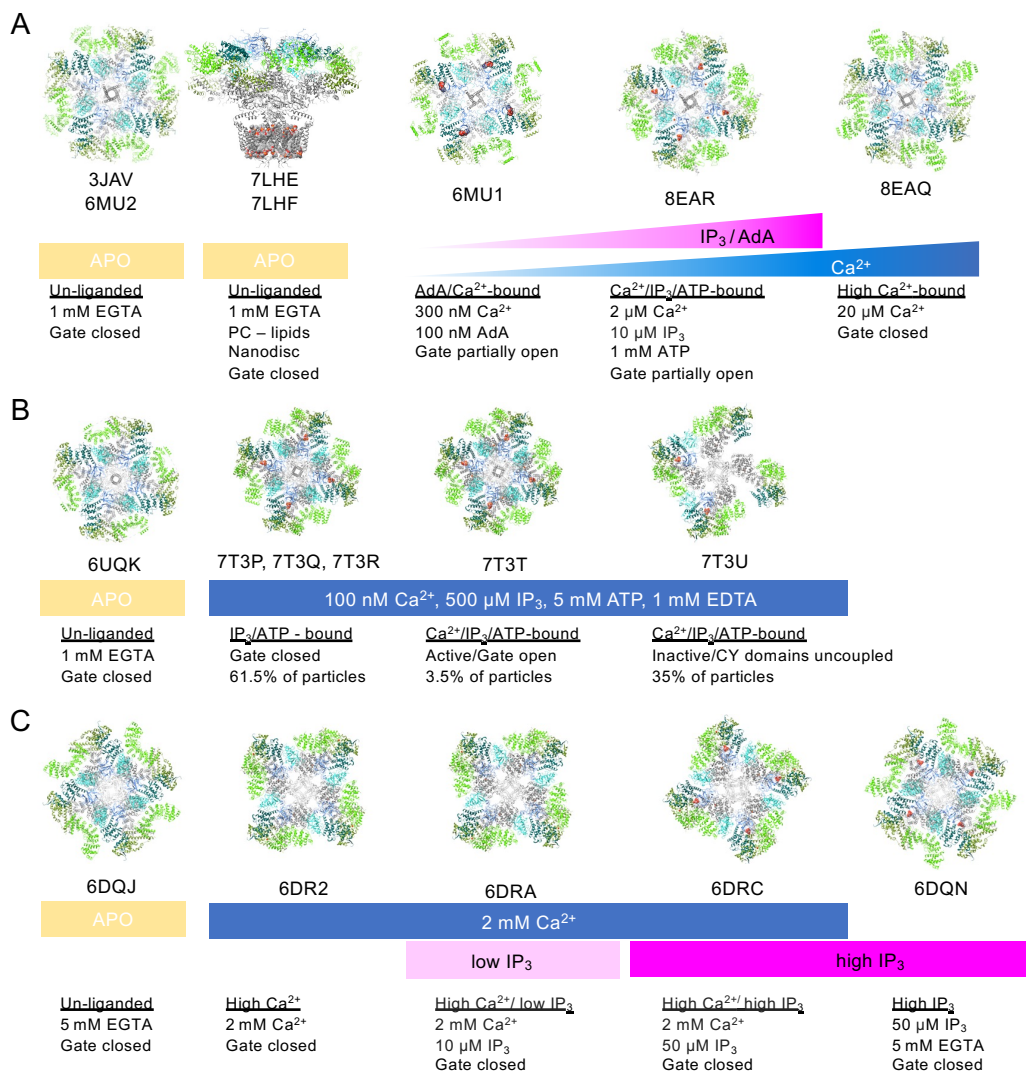

Supplementary Figure 1

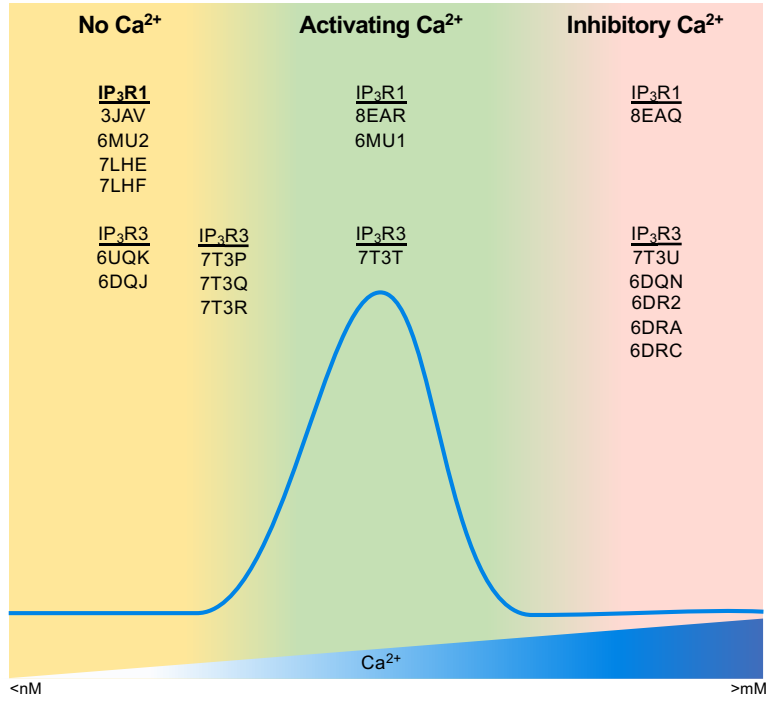

Supplementary Figure 2

Supplement: NIHMS1913656-supplement-2.pdf [file NIHMS1913656-supplement-2.pdf]
